# Supplementary material for: Hidden diversity revealed by genome-resolved metagenomics of iron-oxidizing microbial mats from Lō’ihi Seamount, Hawai’i
Source: PubMed Central journal article supplement — ISME J. 2017 Apr 14;11(8):1900–14. doi: 10.1038/ismej.2017.40 (PMC5520029; doi:10.1038/ismej.2017.40), 2017-04-14
Supplement: ismej201740x1.pdf [file ismej201740x1.pdf]

# Bacterial Community

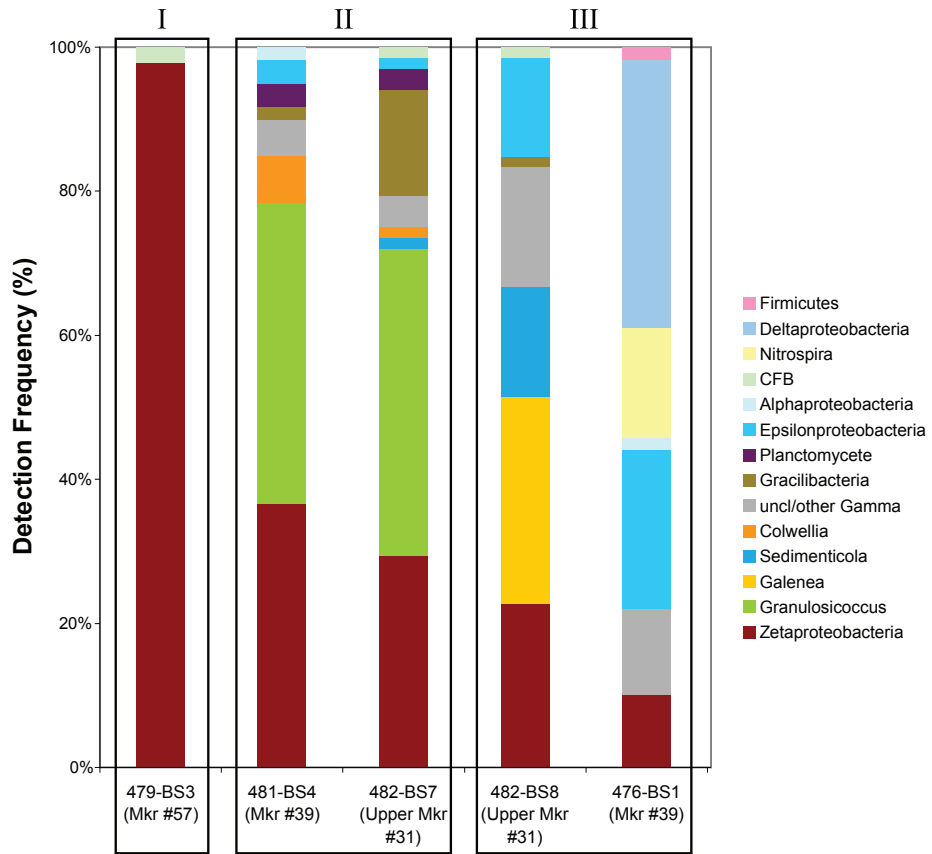

# Zetaproteobacteria Only

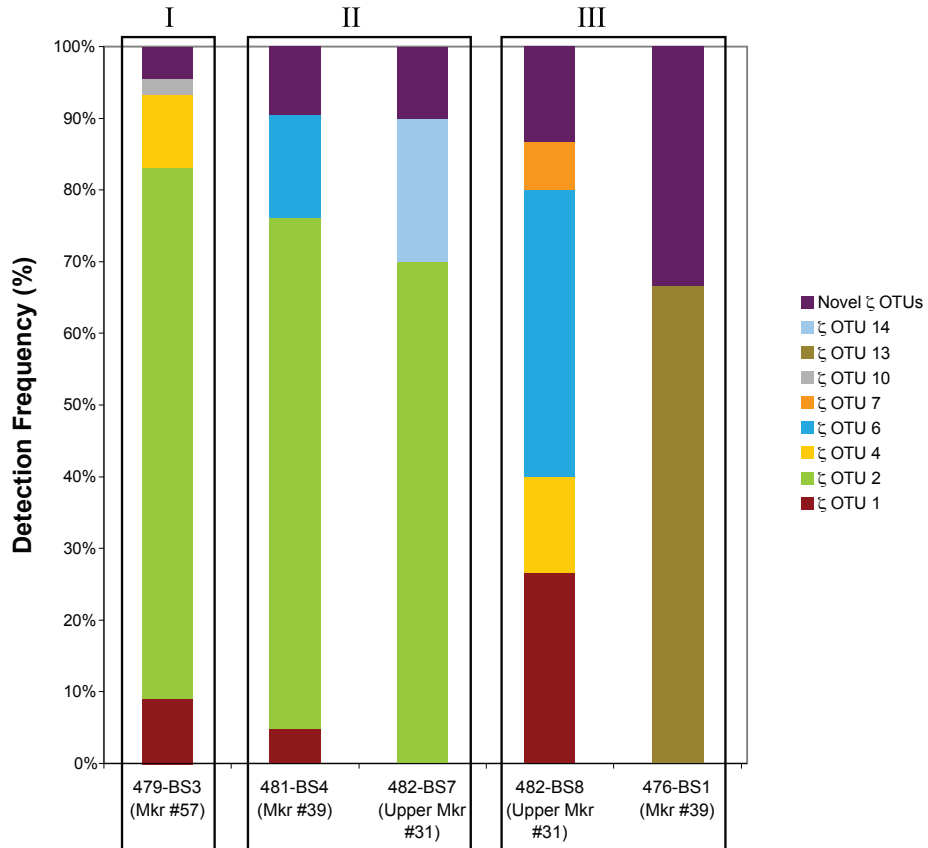

Supplemental Figure 1.

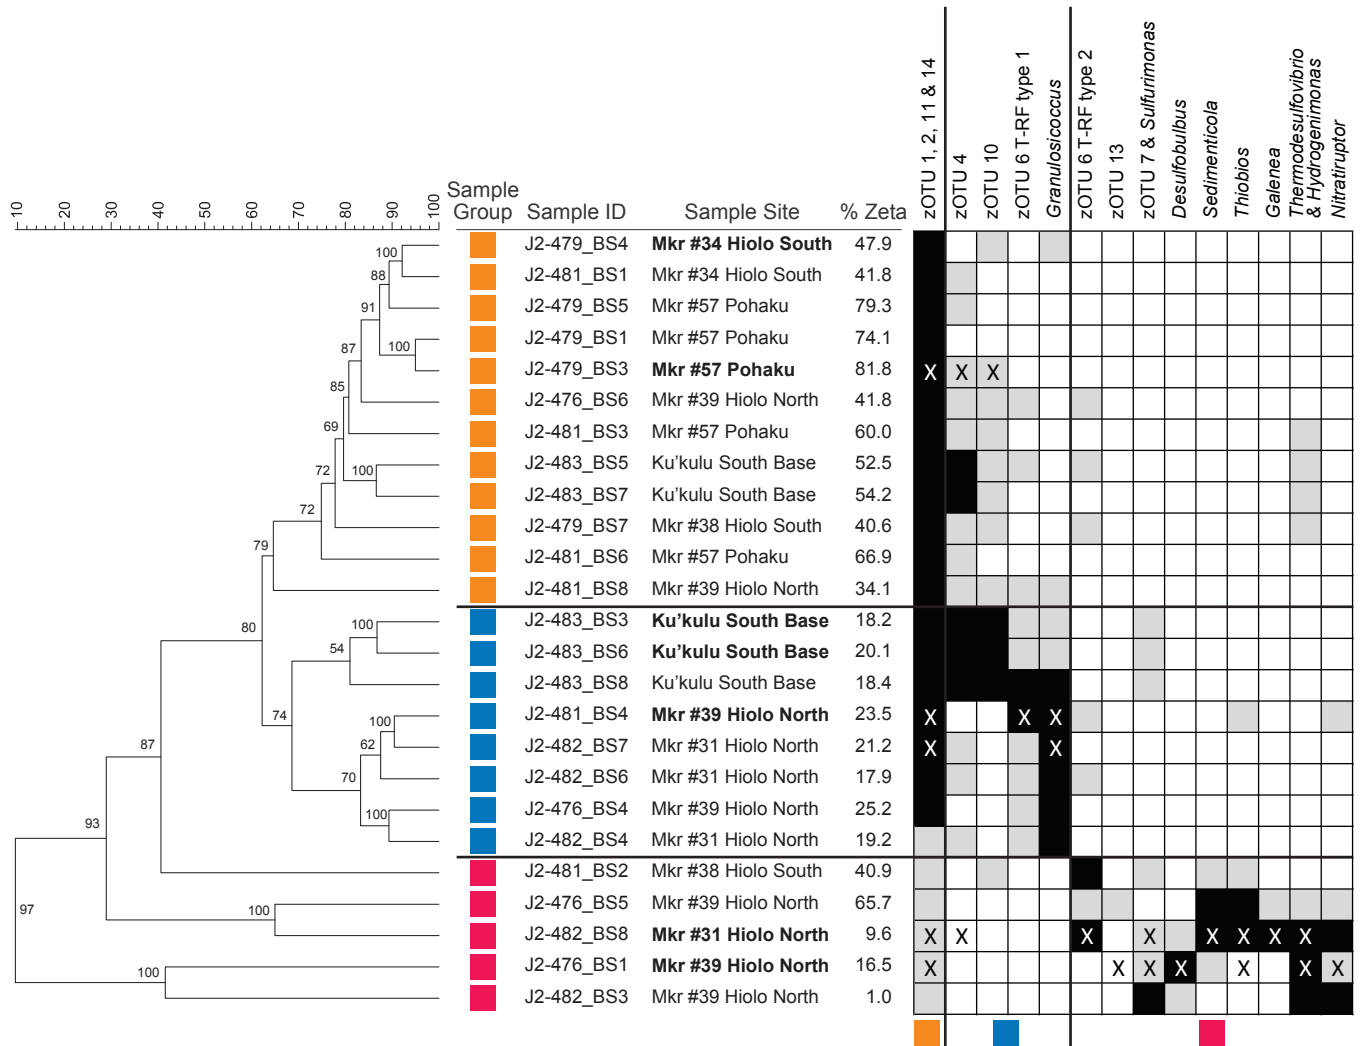

Supplemental Figure 2.

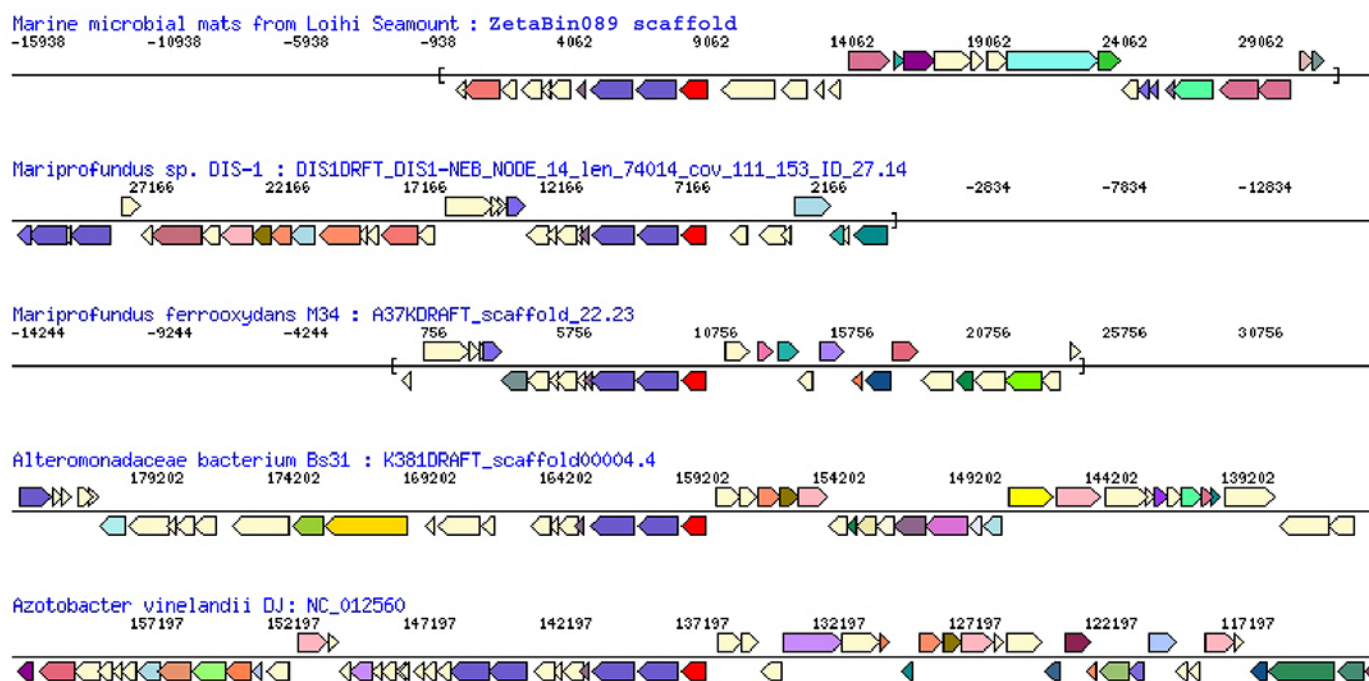

Supplemental Figure 3.

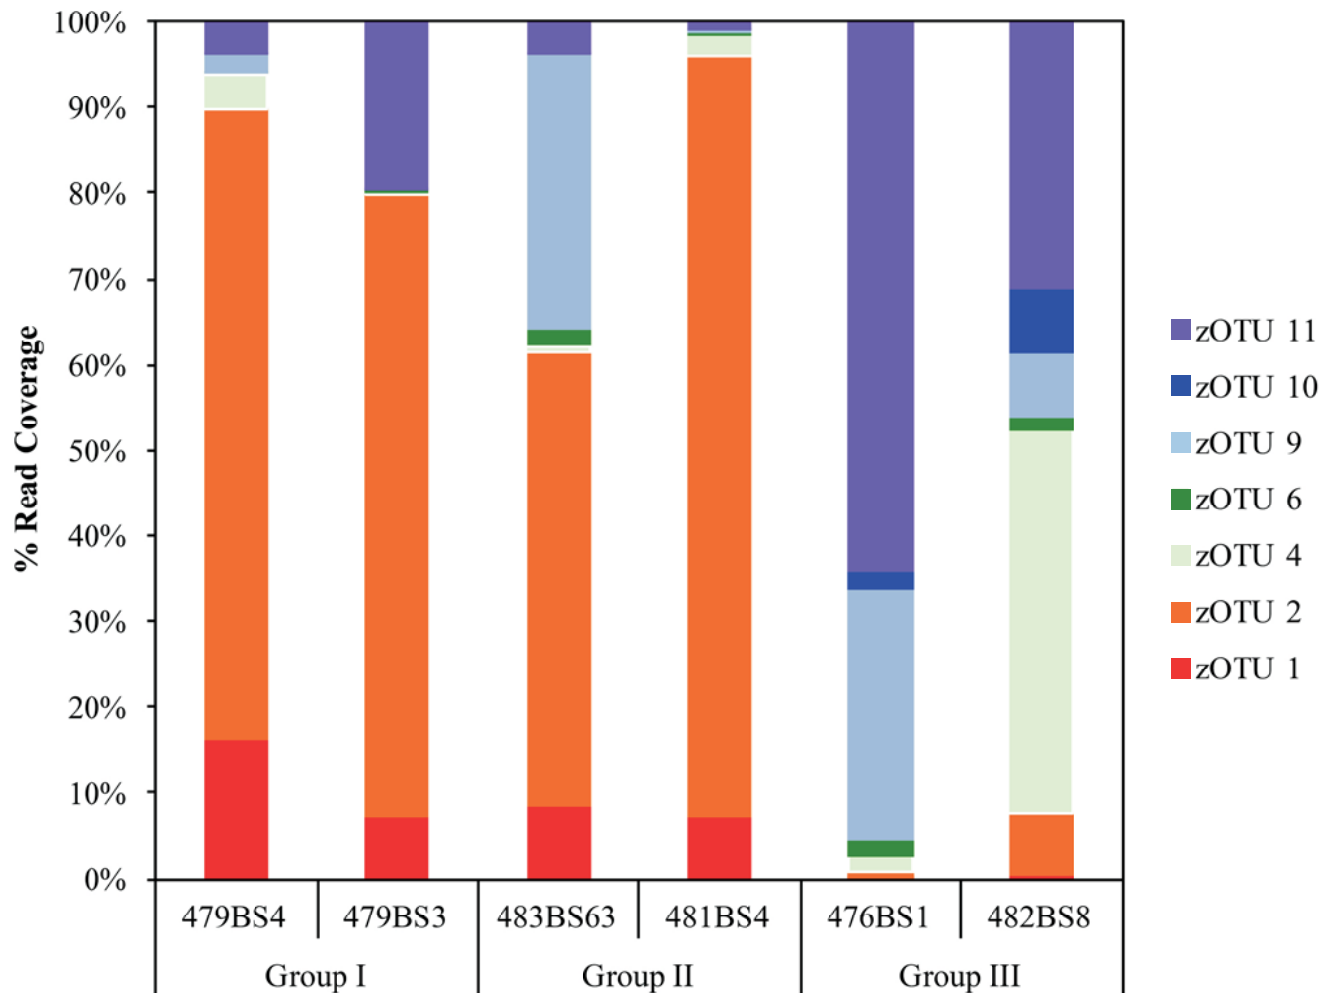

Supplemental Figure 4.

**Supplemental Table 1.** Read Statistics.

| Sample Name | Cycles  | Sequencer | Before Normalization | After Normalization |
|-------------|---------|-----------|----------------------|---------------------|
| 476-BS1     | 2 x 308 | MiSeq     | 62,704,746           | 28,197,716          |
| 479-BS4     | 2 x 308 | MiSeq     | 40,807,268           | 12,391,396          |
| 481-BS3     | 2 x 101 | HiSeq     | 293,219,592          | 36,324,362          |
| 481-BS4     | 2 x 308 | MiSeq     | 49,135,240           | 11,227,026          |
| 482-BS8     | 2 x 308 | MiSeq     | 41,426,814           | 15,618,046          |
| 483-BS63    | 2 x 84  | MiSeq     | 41,991,914           | 6,906,718           |

**Supplemental Table 2.** Genes identified as similar to *M. ferrooxydans* PV-1 *cyc1* (DAA64808.1).

| Scaffold          | Class              | Genome Bin      | Locus Tag           | Gene Product Name                                                           |
|-------------------|--------------------|-----------------|---------------------|-----------------------------------------------------------------------------|
| Ga0117756_1001273 | Zetaproteobacteria | LoihiMaxBin_011 | Ga0117756_100127326 | Cytochrome c553/Cytochrome c553                                             |
| Ga0117756_1000092 | Zetaproteobacteria | LoihiMaxBin_040 | Ga0117756_100009214 | Cytochrome c553/Cytochrome c553                                             |
| Ga0117756_1001286 | Zetaproteobacteria | LoihiMaxBin_041 | Ga0117756_100128619 | Cytochrome c553/Cytochrome c553                                             |
| Ga0117756_1002578 | Zetaproteobacteria | LoihiMaxBin_042 | Ga0117756_100257812 | Cytochrome c553/Cytochrome c553                                             |
| Ga0117756_1001746 | Zetaproteobacteria | LoihiMaxBin_043 | Ga0117756_100174666 | Cytochrome c553/Cytochrome c553                                             |
| Ga0117756_1028789 | Zetaproteobacteria | LoihiMaxBin_047 | Ga0117756_10287891  | Cytochrome c553/Cytochrome c553                                             |
| Ga0117756_1001836 | Zetaproteobacteria | LoihiMaxBin_050 | Ga0117756_100183621 | Cytochrome c553/Cytochrome c553                                             |
| Ga0117756_1051079 | Zetaproteobacteria | LoihiMaxBin_055 | Ga0117756_10510791  | Cytochrome c553                                                             |
| Ga0117756_1038594 | Zetaproteobacteria | LoihiMaxBin_056 | Ga0117756_10385943  | Cytochrome c553/Cytochrome c553                                             |
| Ga0117756_1030170 | Zetaproteobacteria | LoihiMaxBin_059 | Ga0117756_10301701  | Cytochrome c553                                                             |
| Ga0117756_1003929 | Zetaproteobacteria | LoihiMaxBin_065 | Ga0117756_100392910 | Cytochrome c553/Cytochrome c553                                             |
| Ga0117756_1058088 | Zetaproteobacteria | LoihiMaxBin_065 | Ga0117756_10580881  | Cytochrome c553                                                             |
| Ga0117756_1000364 | Zetaproteobacteria | LoihiMaxBin_066 | Ga0117756_100036422 | Cytochrome c553/Cytochrome c553                                             |
| Ga0117756_1003301 | Zetaproteobacteria | LoihiMaxBin_066 | Ga0117756_10033016  | thiosulfate dehydrogenase                                                   |
| Ga0117756_1006226 | Zetaproteobacteria | LoihiMaxBin_077 | Ga0117756_10062266  | Cytochrome c553/Tetraheme cytochrome c subunit of nitrate or TMAO reductase |
| Ga0117756_1008594 | Zetaproteobacteria | LoihiMaxBin_077 | Ga0117756_10085946  | Cytochrome c553/Cytochrome c553                                             |
| Ga0117756_1001414 | Zetaproteobacteria | LoihiMaxBin_079 | Ga0117756_100141411 | Cytochrome c553/Cytochrome c553                                             |
| Ga0117756_1000939 | Zetaproteobacteria | LoihiMaxBin_080 | Ga0117756_100093923 | thiosulfate dehydrogenase                                                   |
| Ga0117756_1040683 | Zetaproteobacteria | LoihiMaxBin_084 | Ga0117756_10406832  | Cytochrome c553/Cytochrome c553                                             |
| Ga0117756_1049104 | Zetaproteobacteria | LoihiMaxBin_084 | Ga0117756_10491041  | Cytochrome c553/Cytochrome c553                                             |
| Ga0117756_1000815 | Zetaproteobacteria | LoihiMaxBin_088 | Ga0117756_100081524 | Cytochrome c553                                                             |
| Ga0117756_1003270 | Zetaproteobacteria | LoihiMaxBin_088 | Ga0117756_10032707  | Cytochrome c553/Tetraheme cytochrome c subunit of nitrate or TMAO reductase |
| Ga0117756_1000031 | Zetaproteobacteria | LoihiMaxBin_089 | Ga0117756_100003124 | Cytochrome c553/Cytochrome c553                                             |
| Ga0117756_1017374 | Zetaproteobacteria | LoihiMaxBin_091 | Ga0117756_10173745  | Cytochrome c553/Cytochrome c553                                             |

**Supplemental Table 3.** Genes identified as similar to *M. ferrooxydans* PV-1 *cyc2* (AKN35166.1).

| Scaffold          | Class              | Genome Bin | Locus Tag           | Gene Product Name    |
|-------------------|--------------------|------------|---------------------|----------------------|
| Ga0117756_1000082 | Zetaproteobacteria | ZetaBin080 | Ga0117756_100008262 | hypothetical protein |
| Ga0117756_1000169 | Zetaproteobacteria | ZetaBin035 | Ga0117756_10001694  | hypothetical protein |
| Ga0117756_1000281 | Zetaproteobacteria | ZetaBin040 | Ga0117756_100028141 | hypothetical protein |
| Ga0117756_1000517 | Zetaproteobacteria | ZetaBin042 | Ga0117756_100051734 | hypothetical protein |
| Ga0117756_1001027 | Zetaproteobacteria | ZetaBin041 | Ga0117756_10010279  | hypothetical protein |
| Ga0117756_1001197 | Zetaproteobacteria | ZetaBin066 | Ga0117756_10011974  | hypothetical protein |
| Ga0117756_1001197 | Zetaproteobacteria | ZetaBin066 | Ga0117756_10011973  | hypothetical protein |
| Ga0117756_1001926 | Zetaproteobacteria | ZetaBin035 | Ga0117756_100192620 | hypothetical protein |
| Ga0117756_1001926 | Zetaproteobacteria | ZetaBin035 | Ga0117756_100192618 | hypothetical protein |
| Ga0117756_1002147 | Zetaproteobacteria | ZetaBin043 | Ga0117756_100214710 | hypothetical protein |
| Ga0117756_1002914 | Zetaproteobacteria | ZetaBin088 | Ga0117756_10029141  | hypothetical protein |
| Ga0117756_1003808 | Zetaproteobacteria | ZetaBin089 | Ga0117756_10038085  | hypothetical protein |
| Ga0117756_1004200 | Zetaproteobacteria | ZetaBin050 | Ga0117756_10042008  | hypothetical protein |
| Ga0117756_1005281 | Zetaproteobacteria | ZetaBin050 | Ga0117756_10052816  | hypothetical protein |
| Ga0117756_1007026 | Zetaproteobacteria | ZetaBin090 | Ga0117756_10070261  | hypothetical protein |
| Ga0117756_1007675 | Zetaproteobacteria | ZetaBin011 | Ga0117756_10076751  | hypothetical protein |
| Ga0117756_1011041 | Zetaproteobacteria | ZetaBin049 | Ga0117756_10110416  | hypothetical protein |
| Ga0117756_1012992 | Zetaproteobacteria | ZetaBin049 | Ga0117756_10129924  | hypothetical protein |
| Ga0117756_1013610 | Zetaproteobacteria | ZetaBin049 | Ga0117756_10136104  | hypothetical protein |
| Ga0117756_1013891 | Zetaproteobacteria | ZetaBin049 | Ga0117756_10138912  | hypothetical protein |
| Ga0117756_1014268 | Zetaproteobacteria | ZetaBin049 | Ga0117756_10142681  | hypothetical protein |
| Ga0117756_1016945 | Zetaproteobacteria | ZetaBin065 | Ga0117756_10169454  | hypothetical protein |
| Ga0117756_1025359 | Zetaproteobacteria | ZetaBin091 | Ga0117756_10253592  | hypothetical protein |
| Ga0117756_1028748 | Zetaproteobacteria | ZetaBin088 | Ga0117756_10287482  | hypothetical protein |
| Ga0117756_1029363 | Zetaproteobacteria | ZetaBin084 | Ga0117756_10293631  | hypothetical protein |
| Ga0117756_1029874 | Zetaproteobacteria | ZetaBin035 | Ga0117756_10298741  | hypothetical protein |
| Ga0117756_1030386 | Zetaproteobacteria | ZetaBin084 | Ga0117756_10303861  | hypothetical protein |
| Ga0117756_1031186 | Zetaproteobacteria | ZetaBin084 | Ga0117756_10311861  | hypothetical protein |
| Ga0117756_1033024 | Zetaproteobacteria | ZetaBin064 | Ga0117756_10330242  | hypothetical protein |
| Ga0117756_1034066 | Zetaproteobacteria | ZetaBin062 | Ga0117756_10340661  | hypothetical protein |
| Ga0117756_1036278 | Zetaproteobacteria | ZetaBin084 | Ga0117756_10362781  | hypothetical protein |
| Ga0117756_1038273 | Zetaproteobacteria | ZetaBin059 | Ga0117756_10382731  | hypothetical protein |
| Ga0117756_1038911 | Zetaproteobacteria | ZetaBin065 | Ga0117756_10389111  | hypothetical protein |
| Ga0117756_1041107 | Zetaproteobacteria | ZetaBin069 | Ga0117756_10411071  | hypothetical protein |
| Ga0117756_1045285 | Zetaproteobacteria | ZetaBin090 | Ga0117756_10452851  | hypothetical protein |
| Ga0117756_1047975 | Zetaproteobacteria | ZetaBin011 | Ga0117756_10479752  | hypothetical protein |
| Ga0117756_1048244 | Zetaproteobacteria | ZetaBin090 | Ga0117756_10482441  | hypothetical protein |
| Ga0117756_1051193 | Zetaproteobacteria | ZetaBin089 | Ga0117756_10511931  | hypothetical protein |
| Ga0117756_1052798 | Zetaproteobacteria | ZetaBin060 | Ga0117756_10527981  | hypothetical protein |
| Ga0117756_1053486 | Zetaproteobacteria | ZetaBin084 | Ga0117756_10534862  | hypothetical protein |
| Ga0117756_1079919 | Zetaproteobacteria | ZetaBin037 | Ga0117756_10799191  | hypothetical protein |

**Supplemental Table 4.** Genes identified as similar to *M.ferrooxydans* PV-1 Mob (SPV1\_03948).

| Scaffold          | Class              | GenomeBin  | Locus Tag           | Gene Product Name                                                                       |
|-------------------|--------------------|------------|---------------------|-----------------------------------------------------------------------------------------|
| Ga0117756_1001425 | Zetaproteobacteria | ZetaBin011 | Ga0117756_100142513 | NADH-quinone oxidoreductase subunit G                                                   |
| Ga0117756_1002014 | Zetaproteobacteria | ZetaBin011 | Ga0117756_100201417 | prokaryotic molybdopterin-containing oxidoreductase family, iron-sulfur binding subunit |
| Ga0117756_1003853 | Zetaproteobacteria | ZetaBin011 | Ga0117756_10038531  | prokaryotic molybdopterin-containing oxidoreductase family, iron-sulfur binding subunit |
| Ga0117756_1038481 | Zetaproteobacteria | ZetaBin011 | Ga0117756_10384811  | prokaryotic molybdopterin-containing oxidoreductase family, iron-sulfur binding subunit |
| Ga0117756_1018933 | Zetaproteobacteria | ZetaBin037 | Ga0117756_10189332  | formate dehydrogenase major subunit                                                     |
| Ga0117756_1001039 | Zetaproteobacteria | ZetaBin040 | Ga0117756_100103913 | assimilatory nitrate reductase catalytic subunit                                        |
| Ga0117756_1003809 | Zetaproteobacteria | ZetaBin040 | Ga0117756_10038098  | nitrate reductase NapA                                                                  |
| Ga0117756_1001693 | Zetaproteobacteria | ZetaBin043 | Ga0117756_10016938  | nitrate reductase NapA                                                                  |
| Ga0117756_1003962 | Zetaproteobacteria | ZetaBin047 | Ga0117756_10039626  | NADH-quinone oxidoreductase subunit G                                                   |
| Ga0117756_1021850 | Zetaproteobacteria | ZetaBin047 | Ga0117756_10218501  | prokaryotic molybdopterin-containing oxidoreductase family, iron-sulfur binding subunit |
| Ga0117756_1038467 | Zetaproteobacteria | ZetaBin047 | Ga0117756_10384673  | prokaryotic molybdopterin-containing oxidoreductase family, iron-sulfur binding subunit |
| Ga0117756_1052450 | Zetaproteobacteria | ZetaBin049 | Ga0117756_10524501  | prokaryotic molybdopterin-containing oxidoreductase family, iron-sulfur binding subunit |
| Ga0117756_1055985 | Zetaproteobacteria | ZetaBin049 | Ga0117756_10559851  | prokaryotic molybdopterin-containing oxidoreductase family, iron-sulfur binding subunit |
| Ga0117756_1001959 | Zetaproteobacteria | ZetaBin050 | Ga0117756_100195912 | prokaryotic molybdopterin-containing oxidoreductase family, iron-sulfur binding subunit |
| Ga0117756_1002724 | Zetaproteobacteria | ZetaBin050 | Ga0117756_10027244  | NADH-quinone oxidoreductase subunit G                                                   |
| Ga0117756_1001247 | Zetaproteobacteria | ZetaBin066 | Ga0117756_100124739 | prokaryotic molybdopterin-containing oxidoreductase family, iron-sulfur binding subunit |
| Ga0117756_1006226 | Zetaproteobacteria | ZetaBin077 | Ga0117756_10062265  | Anaerobic selenocysteine-containing dehydrogenase                                       |
| Ga0117756_1000082 | Zetaproteobacteria | ZetaBin080 | Ga0117756_10000828  | NADH-quinone oxidoreductase subunit G                                                   |
| Ga0117756_1038571 | Zetaproteobacteria | ZetaBin084 | Ga0117756_10385712  | formate dehydrogenase major subunit                                                     |
| Ga0117756_1003270 | Zetaproteobacteria | ZetaBin088 | Ga0117756_10032708  | Anaerobic selenocysteine-containing dehydrogenase                                       |
| Ga0117756_1007462 | Zetaproteobacteria | ZetaBin089 | Ga0117756_10074623  | nitrate reductase NapA                                                                  |
| Ga0117756_1038643 | Zetaproteobacteria | ZetaBin089 | Ga0117756_10386431  | assimilatory nitrate reductase catalytic subunit                                        |
| Ga0117756_1004180 | Zetaproteobacteria | ZetaBin090 | Ga0117756_10041807  | nitrate reductase NapA                                                                  |
| Ga0117756_1016962 | Zetaproteobacteria | ZetaBin091 | Ga0117756_10169623  | assimilatory nitrate reductase catalytic subunit                                        |
| Ga0117756_1004665 | Zetaproteobacteria | ZetaBin092 | Ga0117756_10046658  | nitrate reductase NapA                                                                  |
| Ga0117756_1021839 | Zetaproteobacteria | ZetaBin092 | Ga0117756_10218391  | NADH-quinone oxidoreductase subunit G                                                   |
| Ga0117756_1023392 | Zetaproteobacteria | ZetaBin092 | Ga0117756_10233921  | NADH-quinone oxidoreductase subunit G                                                   |
| Ga0117756_1051284 | Zetaproteobacteria | ZetaBin092 | Ga0117756_10512841  | nitrate reductase NapA                                                                  |



**Supplemental Table 5.** The taxonomic placement and genome bins of the RubisCO Large Chain protein along with the closest BlastP database hit.

| Scaffold          | Locus Tag           | Closest Blast hit               | Type        | pident | length | evalue | bitscore | Gene Name                                     | Class                    | GenomeBin       |
|-------------------|---------------------|---------------------------------|-------------|--------|--------|--------|----------|-----------------------------------------------|--------------------------|-----------------|
| Ga0117756_1036952 | Ga0117756_10369521  | gi 517099781 ref WP_018288599.1 | II          | 89.7   | 468    | 0      | 884      | ribulose-bisphosphate carboxylase large chain | Zetaproteobacteria       | ZetaBin091      |
| Ga0117756_1006443 | Ga0117756_10064431  | gi 517092680 ref WP_018281498.1 | II          | 97.9   | 388    | 0      | 793      | ribulose-bisphosphate carboxylase large chain | Zetaproteobacteria       | ZetaBin089      |
| Ga0117756_1009661 | Ga0117756_10096614  | gi 517092680 ref WP_018281498.1 | II          | 96.1   | 76     | 2E-44  | 159      | ribulose-bisphosphate carboxylase large chain | Zetaproteobacteria       | ZetaBin089      |
| Ga0117756_1016164 | Ga0117756_10161643  | gi 517097112 ref WP_018285930.1 | II          | 93.0   | 445    | 0      | 876      | ribulose-bisphosphate carboxylase large chain | Zetaproteobacteria       | ZetaBin084      |
| Ga0117756_1000143 | Ga0117756_100014332 | gi 517097112 ref WP_018285930.1 | II          | 96.4   | 472    | 0      | 950      | ribulose-bisphosphate carboxylase large chain | Zetaproteobacteria       | ZetaBin080      |
| Ga0117756_1008592 | Ga0117756_10085926  | gi 517097112 ref WP_018285930.1 | II          | 95.7   | 187    | 8E-129 | 382      | ribulose-bisphosphate carboxylase large chain | Zetaproteobacteria       | ZetaBin079      |
| Ga0117756_1017913 | Ga0117756_10179133  | gi 517097112 ref WP_018285930.1 | II          | 95.9   | 170    | 2E-113 | 342      | ribulose-bisphosphate carboxylase large chain | Zetaproteobacteria       | ZetaBin079      |
| Ga0117756_1010223 | Ga0117756_10102234  | gi 517097112 ref WP_018285930.1 | II          | 92.8   | 472    | 0      | 916      | ribulose-bisphosphate carboxylase large chain | Zetaproteobacteria       | ZetaBin077      |
| Ga0117756_1001224 | Ga0117756_100122415 | gi 497537089 ref WP_009851287.1 | II          | 76.6   | 469    | 0      | 758      | ribulose-bisphosphate carboxylase large chain | Zetaproteobacteria       | ZetaBin066      |
| Ga0117756_1009325 | Ga0117756_10093251  | gi 517097112 ref WP_018285930.1 | II          | 100.0  | 58     | 1E-29  | 117      | ribulose-bisphosphate carboxylase large chain | Zetaproteobacteria       | ZetaBin065      |
| Ga0117756_1025537 | Ga0117756_10255372  | gi 517099781 ref WP_018288599.1 | II          | 91.5   | 472    | 0      | 902      | ribulose-bisphosphate carboxylase large chain | Zetaproteobacteria       | ZetaBin065      |
| Ga0117756_1045447 | Ga0117756_10454471  | gi 517097112 ref WP_018285930.1 | II          | 95.5   | 201    | 7E-137 | 404      | ribulose-bisphosphate carboxylase large chain | Zetaproteobacteria       | ZetaBin059      |
| Ga0117756_1036909 | Ga0117756_10369091  | gi 517097112 ref WP_018285930.1 | II          | 96.7   | 366    | 0      | 744      | ribulose-bisphosphate carboxylase large chain | Zetaproteobacteria       | ZetaBin058      |
| Ga0117756_1040564 | Ga0117756_10405641  | gi 517097112 ref WP_018285930.1 | II          | 95.5   | 424    | 0      | 863      | ribulose-bisphosphate carboxylase large chain | Zetaproteobacteria       | ZetaBin057      |
| Ga0117756_1011633 | Ga0117756_10116331  | gi 517099781 ref WP_018288599.1 | II          | 89.8   | 472    | 0      | 890      | ribulose-bisphosphate carboxylase large chain | Zetaproteobacteria       | ZetaBin055      |
| Ga0117756_1008234 | Ga0117756_10082342  | gi 659893037 ref WP_029939712.1 | II          | 77.2   | 465    | 0      | 761      | ribulose-bisphosphate carboxylase large chain | Zetaproteobacteria       | ZetaBin050      |
| Ga0117756_1010010 | Ga0117756_10100105  | gi 657350008 ref WP_029406688.1 | II          | 79.1   | 177    | 1E-93  | 291      | ribulose-bisphosphate carboxylase large chain | Zetaproteobacteria       | ZetaBin050      |
| Ga0117756_1010712 | Ga0117756_10107121  | gi 497537089 ref WP_009851287.1 | II          | 83.4   | 151    | 2E-86  | 272      | ribulose-bisphosphate carboxylase large chain | Zetaproteobacteria       | ZetaBin049      |
| Ga0117756_1030307 | Ga0117756_10303073  | gi 659893037 ref WP_029939712.1 | II          | 76.7   | 223    | 9E-121 | 363      | ribulose-bisphosphate carboxylase large chain | Zetaproteobacteria       | ZetaBin047      |
| Ga0117756_1039135 | Ga0117756_10391352  | gi 659893037 ref WP_029939712.1 | II          | 77.9   | 199    | 2E-106 | 326      | ribulose-bisphosphate carboxylase large chain | Zetaproteobacteria       | ZetaBin047      |
| Ga0117756_1050695 | Ga0117756_10506951  | gi 659893037 ref WP_029939712.1 | II          | 76.2   | 390    | 0      | 630      | ribulose-bisphosphate carboxylase large chain | Zetaproteobacteria       | ZetaBin047      |
| Ga0117756_1002262 | Ga0117756_100226216 | gi 517099781 ref WP_018288599.1 | II          | 100.0  | 471    | 0      | 979      | ribulose-bisphosphate carboxylase large chain | Zetaproteobacteria       | ZetaBin043      |
| Ga0117756_1000102 | Ga0117756_10001023  | gi 517097112 ref WP_018285930.1 | II          | 92.4   | 472    | 0      | 912      | ribulose-bisphosphate carboxylase large chain | Zetaproteobacteria       | ZetaBin042      |
| Ga0117756_1002917 | Ga0117756_100291713 | gi 517097112 ref WP_018285930.1 | II          | 95.8   | 472    | 0      | 956      | ribulose-bisphosphate carboxylase large chain | Zetaproteobacteria       | ZetaBin041      |
| Ga0117756_1000051 | Ga0117756_100005126 | gi 517092680 ref WP_018281498.1 | II          | 100.0  | 468    | 0      | 973      | ribulose-bisphosphate carboxylase large chain | Zetaproteobacteria       | ZetaBin040      |
| Ga0117756_1019077 | Ga0117756_10190771  | gi 517092680 ref WP_018281498.1 | II          | 74.9   | 179    | 3E-89  | 280      | ribulose-bisphosphate carboxylase large chain | Zetaproteobacteria       | ZetaBin037      |
| Ga0117756_1003323 | Ga0117756_10033234  | gi 737402008 ref WP_035383183.1 | II          | 92.3   | 470    | 0      | 905      | ribulose-bisphosphate carboxylase large chain | Zetaproteobacteria       | ZetaBin035      |
| Ga0117756_1022954 | Ga0117756_10229541  | gi 517099781 ref WP_018288599.1 | II          | 92.7   | 385    | 0      | 757      | ribulose-bisphosphate carboxylase large chain | Zetaproteobacteria       | ZetaBin022      |
| Ga0117756_1050794 | Ga0117756_10507941  | gi 490178889 ref WP_004077508.1 | I           | 65.9   | 82     | 2E-29  | 118      | ribulose-bisphosphate carboxylase large chain | Zetaproteobacteria       | ZetaBin022      |
| Ga0117756_1002975 | Ga0117756_10029751  | gi 659893037 ref WP_029939712.1 | II          | 78.1   | 465    | 0      | 759      | ribulose-bisphosphate carboxylase large chain | Zetaproteobacteria       | ZetaBin011      |
| Ga0117756_1137224 | Ga0117756_11372241  | gi 496642367 ref WP_011323101.1 | III         | 57.1   | 133    | 4E-42  | 155      | ribulose-bisphosphate carboxylase large chain | IMG=Alphaproteobacteria  | unbinned        |
| Ga0117756_1056354 | Ga0117756_10563541  | gi 517097112 ref WP_018285930.1 | II          | 95.0   | 160    | 1E-107 | 327      | ribulose-bisphosphate carboxylase large chain | IMG=Zetaproteobacteria   | unbinned        |
| Ga0117756_1067788 | Ga0117756_10677881  | gi 740417597 ref WP_038250565.1 | II          | 87.8   | 302    | 0      | 563      | ribulose-bisphosphate carboxylase large chain | IMG=Zetaproteobacteria   | unbinned        |
| Ga0117756_1070361 | Ga0117756_10703611  | gi 759380765 ref WP_043107373.1 | II          | 98.6   | 293    | 0      | 603      | ribulose-bisphosphate carboxylase large chain | IMG=Gammmaproteobacteria | unbinned        |
| Ga0117756_1070520 | Ga0117756_10705201  | gi 517097112 ref WP_018285930.1 | II          | 98.6   | 73     | 2E-40  | 148      | ribulose-bisphosphate carboxylase large chain | IMG=Zetaproteobacteria   | unbinned        |
| Ga0117756_1077249 | Ga0117756_10772491  | gi 503057046 ref WP_013292022.1 | II          | 74.9   | 227    | 2E-121 | 365      | ribulose-bisphosphate carboxylase large chain | IMG=Zetaproteobacteria   | unbinned        |
| Ga0117756_1079512 | Ga0117756_10795121  | gi 740417597 ref WP_038250565.1 | II          | 88.6   | 262    | 1E-173 | 499      | ribulose-bisphosphate carboxylase large chain | IMG=Zetaproteobacteria   | unbinned        |
| Ga0117756_1083217 | Ga0117756_10832171  | gi 517097112 ref WP_018285930.1 | II          | 100.0  | 249    | 0      | 522      | ribulose-bisphosphate carboxylase large chain | IMG=Betaproteobacteria   | unbinned        |
| Ga0117756_1084274 | Ga0117756_10842742  | gi 517097112 ref WP_018285930.1 | II          | 90.3   | 31     | 8E-10  | 61.6     | ribulose-bisphosphate carboxylase large chain | IMG=Zetaproteobacteria   | unbinned        |
| Ga0117756_1084399 | Ga0117756_10843991  | gi 517099781 ref WP_018288599.1 | II          | 92.8   | 249    | 2E-170 | 491      | ribulose-bisphosphate carboxylase large chain | IMG=Zetaproteobacteria   | unbinned        |
| Ga0117756_1095397 | Ga0117756_10953971  | gi 759380765 ref WP_043107373.1 | II          | 91.0   | 145    | 4E-90  | 281      | ribulose-bisphosphate carboxylase large chain | IMG=Gammmaproteobacteria | unbinned        |
| Ga0117756_1106676 | Ga0117756_11066761  | gi 517092680 ref WP_018281498.1 | II          | 90.1   | 201    | 2E-131 | 389      | ribulose-bisphosphate carboxylase large chain | IMG=Zetaproteobacteria   | unbinned        |
| Ga0117756_1110271 | Ga0117756_11102711  | gi 506245542 ref WP_015765417.1 | II          | 91.8   | 195    | 9E-128 | 379      | ribulose-bisphosphate carboxylase large chain | IMG=Gammmaproteobacteria | unbinned        |
| Ga0117756_1111400 | Ga0117756_11114001  | gi 517092680 ref WP_018281498.1 | II          | 74.7   | 142    | 5E-66  | 219      | ribulose-bisphosphate carboxylase large chain | IMG=Gammmaproteobacteria | unbinned        |
| Ga0117756_1114043 | Ga0117756_11140431  | gi 517097112 ref WP_018285930.1 | II          | 91.1   | 190    | 5E-124 | 370      | ribulose-bisphosphate carboxylase large chain | IMG=Zetaproteobacteria   | unbinned        |
| Ga0117756_1128243 | Ga0117756_11282431  | gi 517097112 ref WP_018285930.1 | II          | 93.6   | 172    | 3E-114 | 345      | ribulose-bisphosphate carboxylase large chain | IMG=Zetaproteobacteria   | unbinned        |
| Ga0117756_1144663 | Ga0117756_11446631  | gi 764556396 ref WP_044418808.1 | II          | 89.6   | 154    | 2E-95  | 295      | ribulose-bisphosphate carboxylase large chain | IMG=Alphaproteobacteria  | unbinned        |
| Ga0117756_1151383 | Ga0117756_11513832  | gi 502888301 ref WP_013123277.1 | II          | 90.5   | 63     | 3E-32  | 125      | ribulose-bisphosphate carboxylase large chain | IMG=Zetaproteobacteria   | unbinned        |
| Ga0117756_1085828 | Ga0117756_10858281  | gi 737267451 ref WP_035251360.1 | I           | 87.9   | 58     | 2E-26  | 108      | ribulose-bisphosphate carboxylase large chain | IMG=Alphaproteobacteria  | unbinned        |
| Ga0117756_1061759 | Ga0117756_10617591  | gi 518005896 ref WP_019176104.1 | I           | 53.4   | 262    | 2E-82  | 265      | ribulose-bisphosphate carboxylase large chain | IMG=Methanomicrobium     | unbinned        |
| Ga0117756_1076488 | Ga0117756_10764882  | gi 759380759 ref WP_043107369.1 | I           | 100.0  | 37     | 4E-17  | 82.4     | ribulose-bisphosphate carboxylase large chain | IMG=Gammmaproteobacteria | unbinned        |
| Ga0117756_1083288 | Ga0117756_10832881  | gi 759380759 ref WP_043107369.1 | I           | 99.5   | 198    | 4E-138 | 406      | ribulose-bisphosphate carboxylase large chain | IMG=Gammmaproteobacteria | unbinned        |
| Ga0117756_1152120 | Ga0117756_11521201  | gi 504020534 ref WP_014254528.1 | -           | 66.9   | 151    | 2E-63  | 210      | ribulose-bisphosphate carboxylase large chain | IMG=Methanomicrobium     | unbinned        |
| Ga0117756_1000071 | Ga0117756_100007122 | gi 924870411 ref WP_053549117.1 | not rubisco | 56.6   | 129    | 2E-46  | 160      | ribulose-bisphosphate carboxylase large chain | Nitrospirae              | NitroBin001     |
| Ga0117756_1000235 | Ga0117756_10002351  | gi 504865161 ref WP_015052263.1 | -           | 74.7   | 474    | 0      | 775      | ribulose-bisphosphate carboxylase large chain | Unclassified Archaea     | LoihiMaxBin001  |
| Ga0117756_1000202 | Ga0117756_100020230 | gi 518331021 ref WP_019501228.1 | I           | 67.7   | 464    | 0      | 656      | ribulose-bisphosphate carboxylase large chain | Caldilineae              | CaldiBin024     |
| Ga0117756_1022958 | Ga0117756_10229581  | gi 506220048 ref WP_015739823.1 | III         | 52.0   | 177    | 6E-51  | 180      | ribulose-bisphosphate carboxylase large chain | Anaerolineae             | AaeroBin020     |
| Ga0117756_1015772 | Ga0117756_10157722  | gi 503448813 ref WP_013683474.1 | III         | 55.3   | 423    | 1E-162 | 477      | ribulose-bisphosphate carboxylase large chain | Unclassified Archaea     | LoihiMaxBin012  |
| Ga0117756_1020642 | Ga0117756_10206421  | gi 495361790 ref WP_008086508.1 | III         | 57.3   | 419    | 4E-170 | 496      | ribulose-bisphosphate carboxylase large chain | Ignaviibacteria          | IgnaviMaxBin015 |
| Ga0117756_1000079 | Ga0117756_10000797  | gi 918697881 ref WP_052567263.1 | not rubisco | 40.6   | 527    | 2E-132 | 407      | ribulose-bisphosphate carboxylase large chain | gemmatimonadetes         | GemmaBin005     |
| Ga0117756_1003443 | Ga0117756_10034437  | gi 500421767 ref WP_011930036.1 | II          | 91.3   | 460    | 0      | 884      | ribulose-bisphosphate carboxylase large chain | Gammmaproteobacteria     | GammaBin093     |
| Ga0117756_1000371 | Ga0117756_100037123 | gi 656108512 ref WP_029132057.1 | II          | 83.7   | 459    | 0      | 824      | ribulose-bisphosphate carboxylase large chain | Gammmaproteobacteria     | GammaBin082     |
| Ga0117756_1000877 | Ga0117756_10008773  | gi 500421767 ref WP_011930036.1 | II          | 91.7   | 460    | 0      | 889      | ribulose-bisphosphate carboxylase large chain | Gammmaproteobacteria     | GammaBin076     |
| Ga0117756_1032300 | Ga0117756_10323002  | gi 928926965 ref WP_053951892.1 | II          | 95.0   | 460    | 0      | 909      | ribulose-bisphosphate carboxylase large chain | Gammmaproteobacteria     | GammaBin063     |
| Ga0117756_1021618 | Ga0117756_10216181  | gi 640165948 ref WP_024807638.1 | II          | 71.6   | 461    | 0      | 707      | ribulose-bisphosphate carboxylase large chain | Gammmaproteobacteria     | GammaBin045     |
| Ga0117756_1046377 | Ga0117756_10463771  | gi 497537089 ref WP_009851287.1 | II          | 94.6   | 388    | 0      | 770      | ribulose-bisphosphate carboxylase large chain | Gammmaproteobacteria     | GammaBin045     |
| Ga0117756_1057876 | Ga0117756_10578761  | gi 751599392 ref WP_041067559.1 | II          | 94.5   | 274    | 0      | 546      | ribulose-bisphosphate carboxylase large chain | Gammmaproteobacteria     | GammaBin045     |
| Ga0117756_1025798 | Ga0117756_10257982  | gi 759392796 ref WP_043117722.1 | I           | 96.9   | 413    | 0      | 842      | ribulose-bisphosphate carboxylase large chain | Gammmaproteobacteria     | GammaBin045     |
| Ga0117756_1002875 | Ga0117756_10028757  | gi 521063127 ref WP_020395078.1 | II          | 90.7   | 461    | 0      | 886      | ribulose-bisphosphate carboxylase large chain | Gammmaproteobacteria     | GammaBin038     |
| Ga0117756_1006138 | Ga0117756_10061384  | gi 983348972 ref WP_060528669.1 | II          | 94.4   | 461    | 0      | 918      | ribulose-bisphosphate carboxylase large chain | Gammmaproteobacteria     | GammaBin038     |
| Ga0117756_1043410 | Ga0117756_10434101  | gi 983348972 ref WP_060528669.1 | II          | 92.0   | 162    | 8E-105 | 319      | ribulose-bisphosphate carboxylase large chain | Gammmaproteobacteria     | GammaBin038     |

**Supplemental Table 6.** Genes identified as ATP-citrate lyase Beta-subunits.

| Scaffold          | Class                 | Genome Bin    | Locus Tag           | Gene Name                      | Closes species as identified by IMG       |
|-------------------|-----------------------|---------------|---------------------|--------------------------------|-------------------------------------------|
| Ga0117756_1000566 | Epsilonproteobacteria | EpsilonBin032 | Ga0117756_100056631 | ATP-citrate lyase beta-subunit | Sulfurovum sp. AR                         |
| Ga0117756_1004299 | Epsilonproteobacteria | EpsilonBin027 | Ga0117756_10042996  | ATP-citrate lyase beta-subunit | Nitratiruptor sp. SB155-2                 |
| Ga0117756_1006995 | Epsilonproteobacteria | EpsilonBin053 | Ga0117756_10069953  | ATP-citrate lyase beta-subunit | Sulfurovum sp. AR                         |
| Ga0117756_1047188 | Epsilonproteobacteria | EpsilonBin071 | Ga0117756_10471882  | ATP-citrate lyase beta-subunit | Sulfurovum sp. AR                         |
| Ga0117756_1059723 | Epsilonproteobacteria | EpsilonBin033 | Ga0117756_10597232  | ATP-citrate lyase beta-subunit | Sulfurimonas autotrophica OK10, DSM 16294 |
| Ga0117756_1137333 | NA                    | NA            | Ga0117756_11373331  | ATP-citrate lyase beta-subunit | Sulfurimonas autotrophica OK10, DSM 16294 |
| Ga0117756_1139997 | NA                    | NA            | Ga0117756_11399971  | ATP-citrate lyase beta-subunit | Sulfurimonas autotrophica OK10, DSM 16294 |
